# Supplementary material for: Reshaping Hyperspectral Data into a Two-Dimensional Image for a CNN Model to Classify Plant Species from Reflectance
Source: MDPI journal article supplement (doi:10.3390/rs14163972), 2022-08-16
Supplement: s1 [file s1]

Archive with 1 entries (1 files):
- remotesensing-1805628-supplementary.pdf
