# Supplementary material for: Reshaping Hyperspectral Data into a Two-Dimensional Image for a CNN Model to Classify Plant Species from Reflectance
Source: MDPI journal article supplement (doi:10.3390/rs14163972), 2022-08-16
Supplement: s1 [file s1 › remotesensing-1805628-supplementary.pdf]

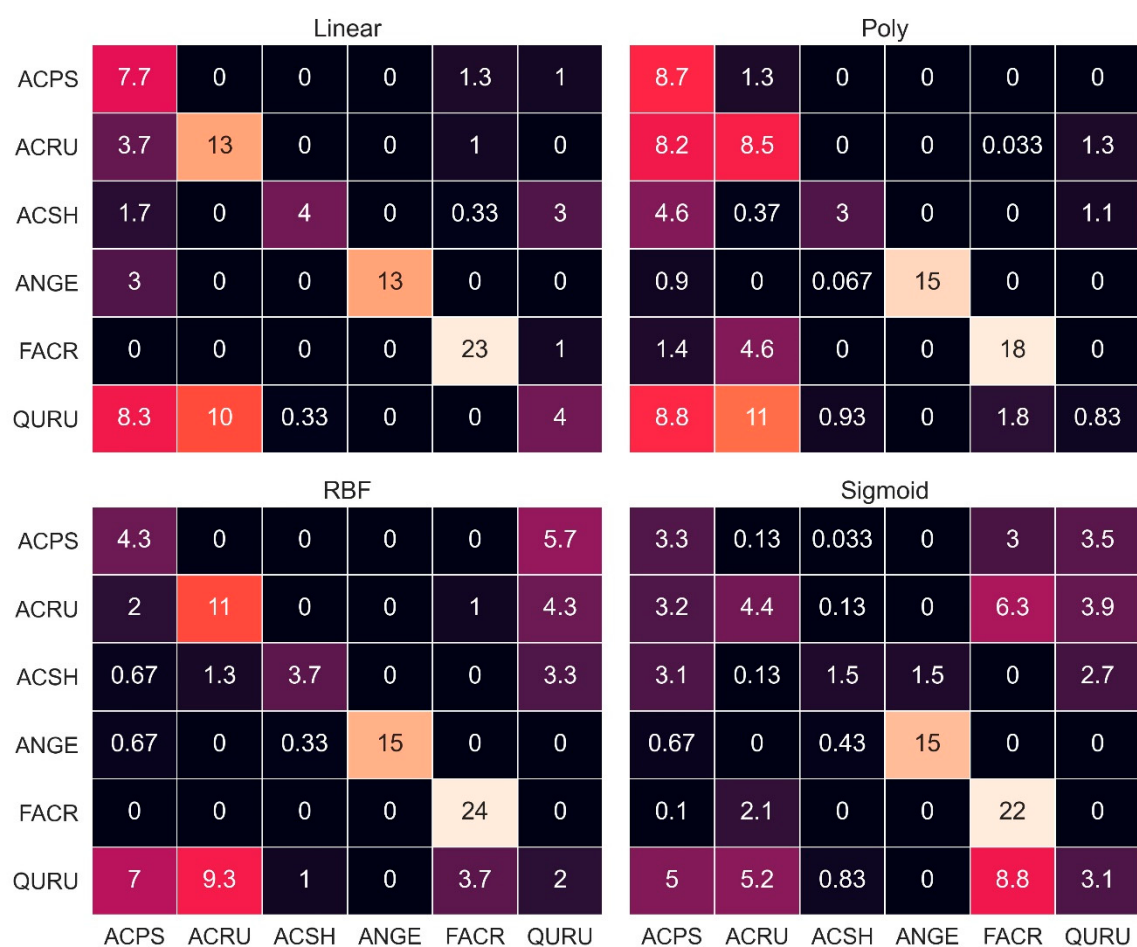

**Figure S1.** Prediction confusion matrices for different SVM kernels, linear, poly, RBF, and sigmoid.

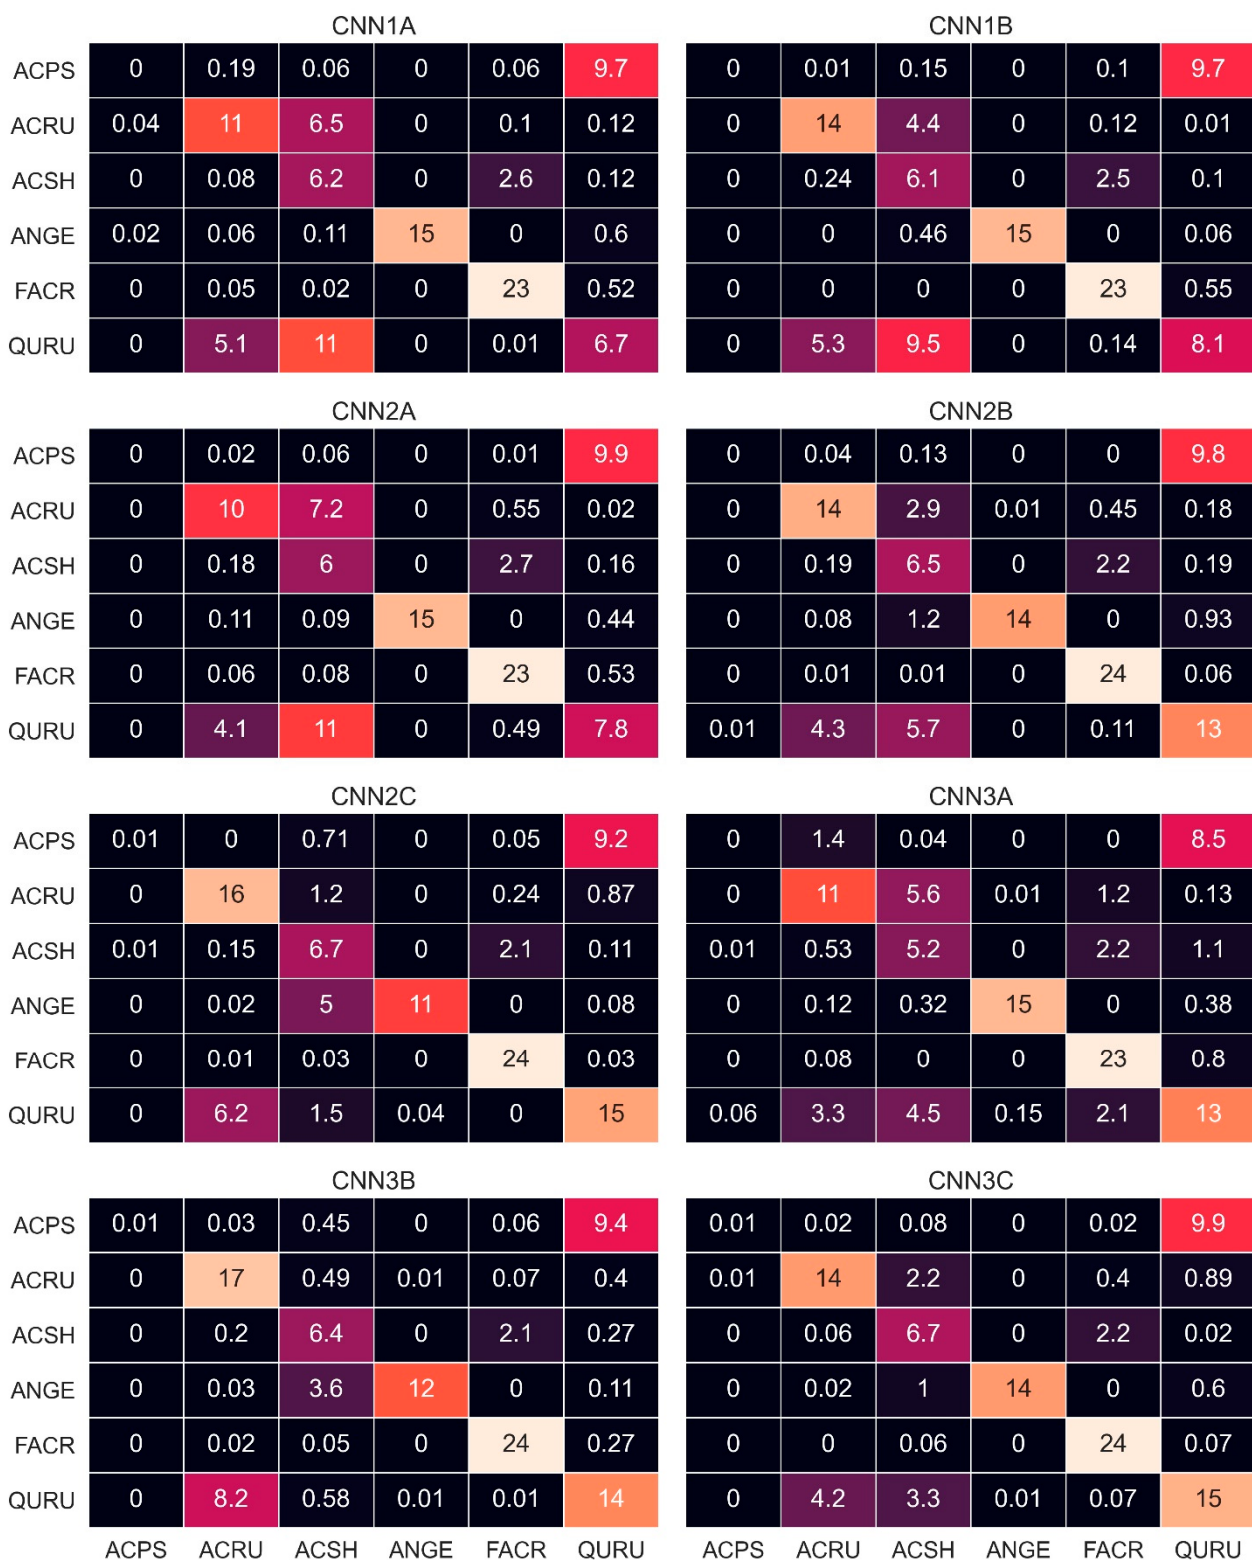

Figure S2. Prediction confusion matrices for CNN models.
